# Supplementary material for: Competition for hosts modulates vast antigenic diversity to generate persistent strain structure in Plasmodium falciparum
Source: PubMed Central journal article supplement (PMC6611651; doi:10.1371/journal.pbio.3000336), 2019-06-24

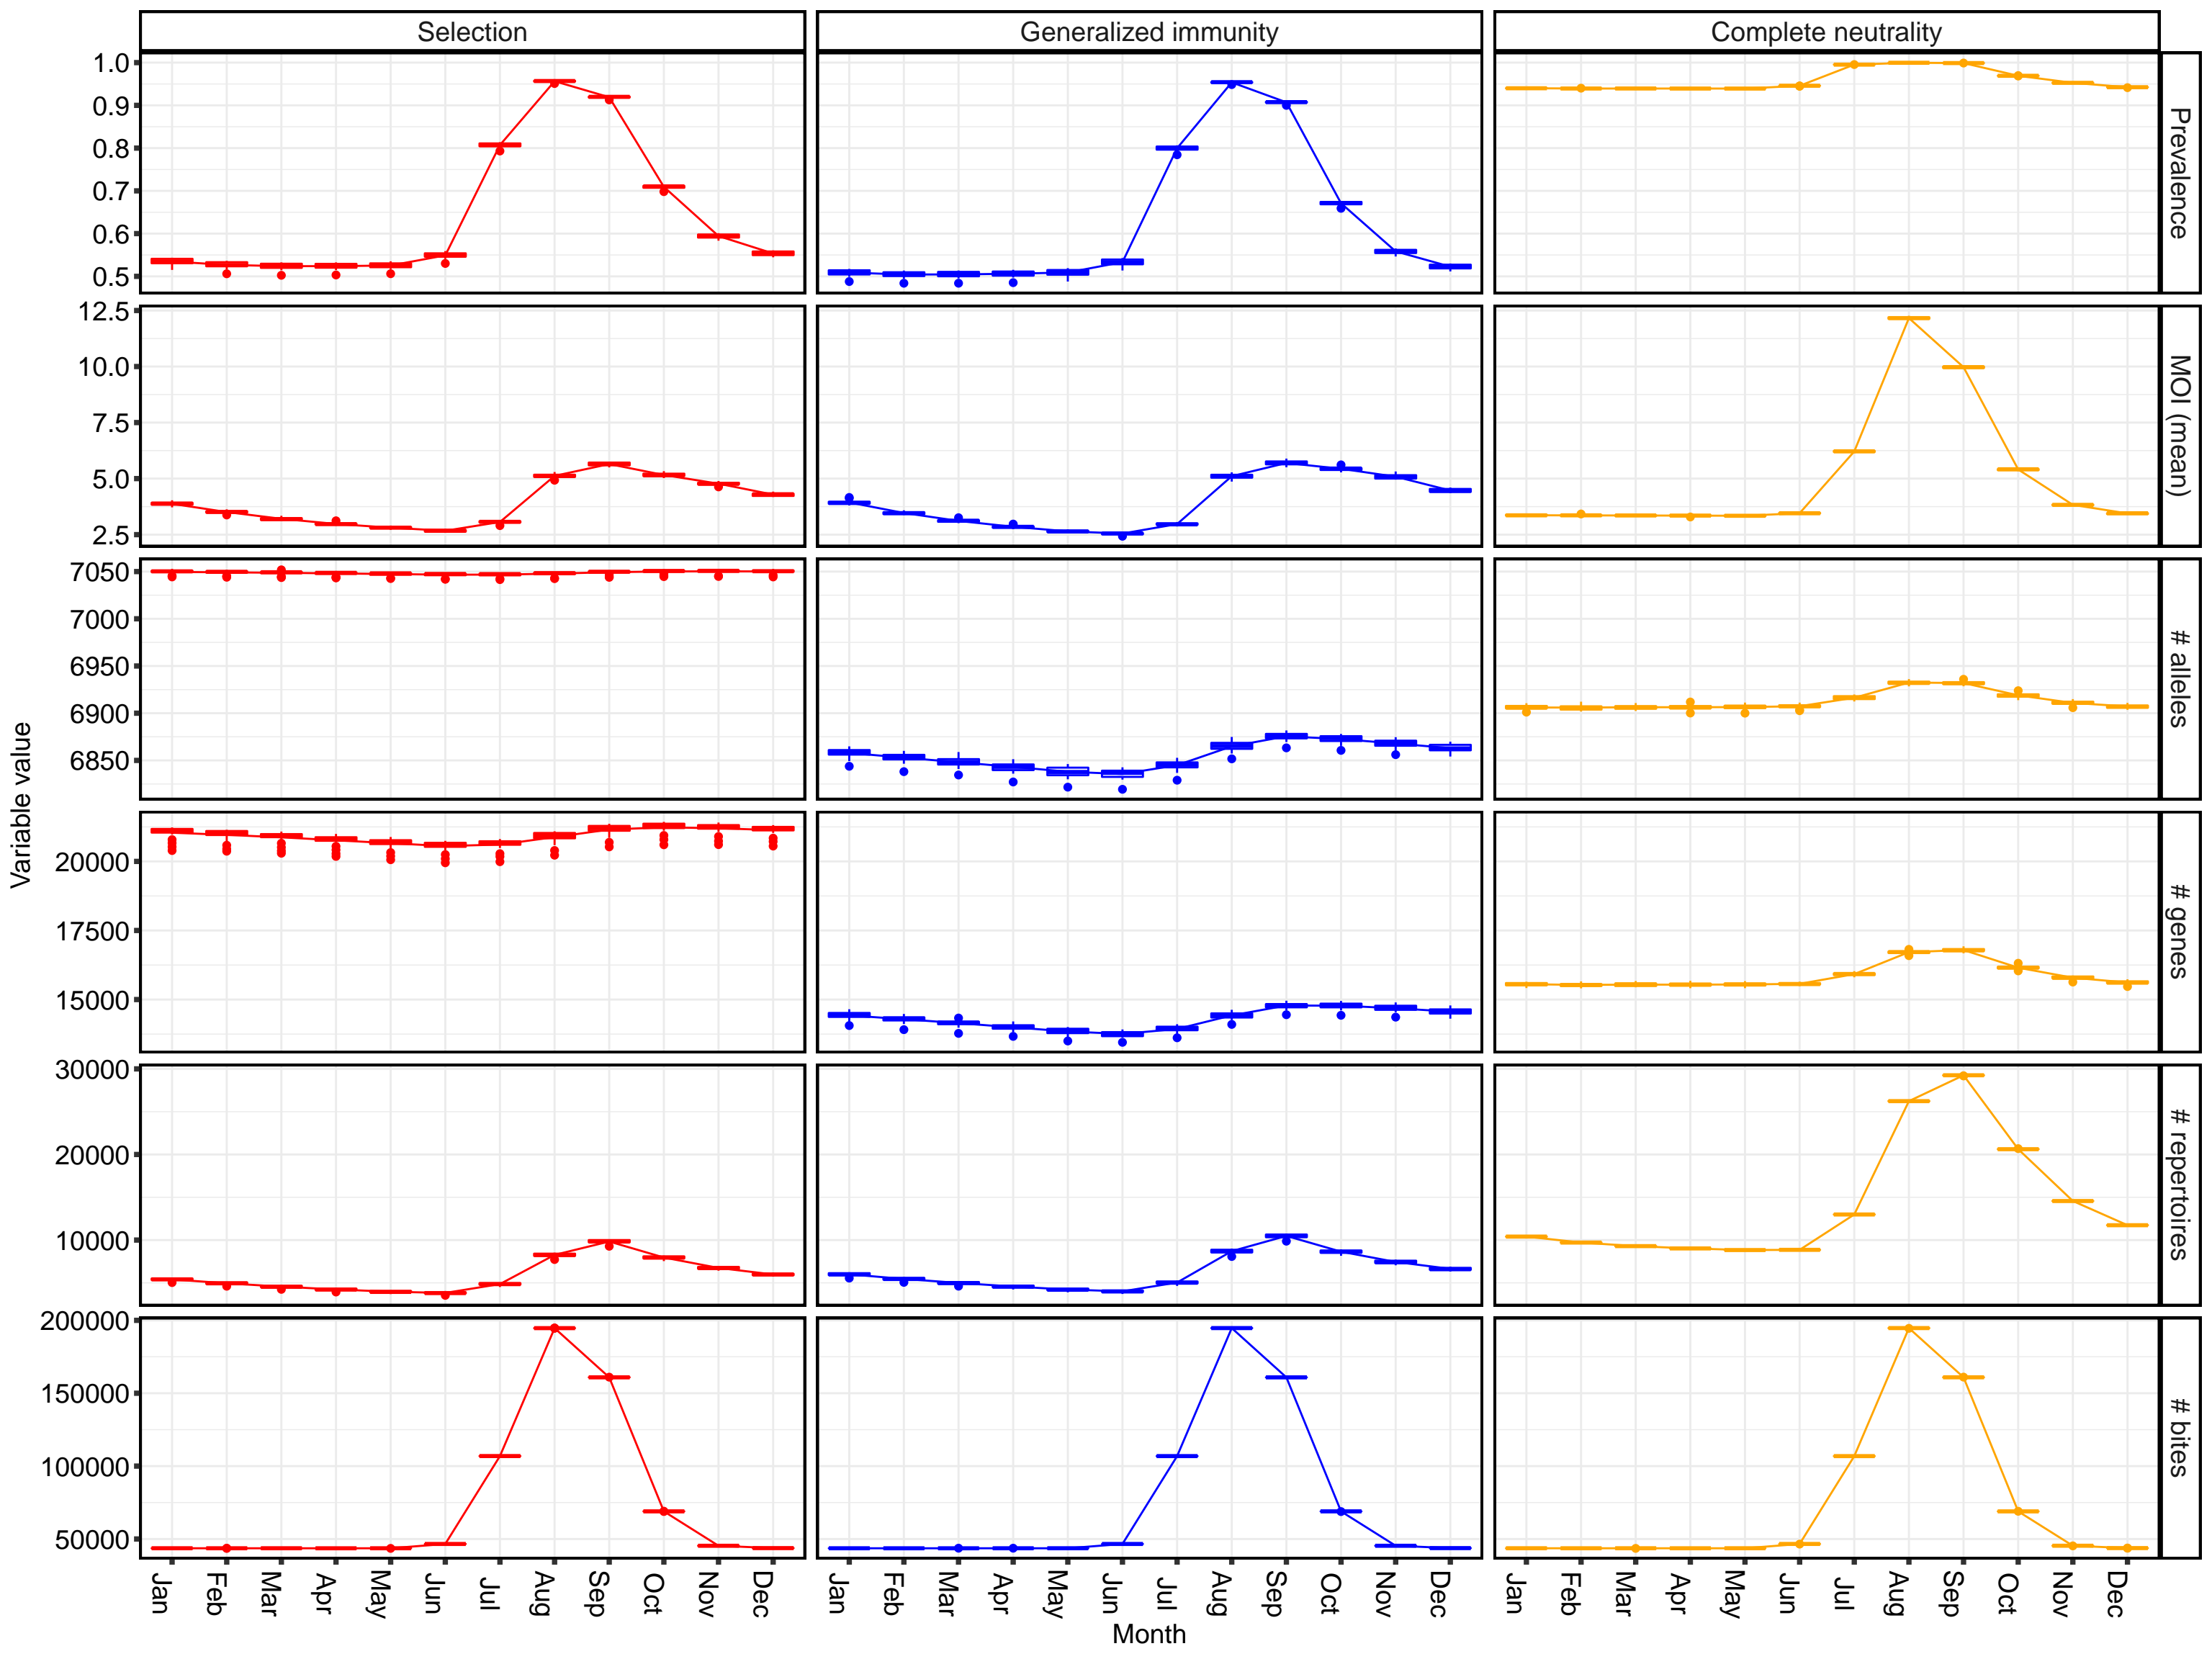

Supplement: pbio.3000336.s009.pdf [file pbio.3000336.s009.pdf]
