# Supplementary material for: Competition for hosts modulates vast antigenic diversity to generate persistent strain structure in Plasmodium falciparum
Source: PubMed Central journal article supplement (PMC6611651; doi:10.1371/journal.pbio.3000336), 2019-06-24
Supplement: pbio.3000336.s015.pdf [file pbio.3000336.s015.pdf]

**Table S1. Summary of empirical data relevant for this study (extended details are in [1, 2]).** **Isolates** are the number of people in which the parasite was detected by microscopy. **Unique *var* types** is the total number of genes obtained from the DBL $\alpha$  marker with the standard 96% similarity cutoff. **Alleles** is the number of alleles from the UpsBC *var* gene group that were detected in isolates with a single infection (**MOI1**; defined as isolates from which 40-55 *var* UpsBC genes were sampled). The last two columns describe the data used in the empirical analysis in the main text, with MOI1 being the number of nodes.

| Survey | Sampling date | People sampled | Isolates | Unique <i>var</i> types | Alleles | MOI1 |
|--------|---------------|----------------|----------|-------------------------|---------|------|
| Sv1    | Oct. 2012     | 1923           | 808      | 35,345                  | 2866    | 90   |
| Sv2    | May-Jun. 2013 | 1902           | 513      | 27,586                  | 2540    | 68   |
| Sv3    | May-Jun. 2014 | 1822           | 535      | 24,962                  | 2505    | 69   |
| Sv4    | Oct. 2014     | 1866           | 430      | 16,222                  | 2143    | 52   |
| Sv5    | Oct. 2015     | 2022           | 545      | 19,630                  | 3019    | 115  |
| Sv6    | May-Jun. 2016 | 2091           | 272      | 18,103                  | 2032    | 44   |

## References

- [1] Tiedje KE, Oduro A, Agongo G, Anyorigiya T, Azongo D, Awine T, et al. Seasonal Variation in the Epidemiology of Asymptomatic Plasmodium falciparum Infections Across Two Catchment Areas in Bongo District, Ghana. *Am J Trop Med Hyg.* 2017;97(1):199–212. doi:10.4269/ajtmh.16-0959.
- [2] He Q, Pilosof S, Tiedje KE, Ruybal-Pesántez S, Artzy-Randrup Y, Baskerville EB, et al. Networks of genetic similarity reveal non-neutral processes shape strain structure in Plasmodium falciparum. *Nat Commun.* 2018;9(1):1817. doi:10.1038/s41467-018-04219-3.
